# Supplementary material for: Oxidative Molecular Layer Deposition Tailoring Eco-Mimetic Nanoarchitecture to Manipulate Electromagnetic Attenuation and Self-Powered Energy Conversion
Source: PubMed Central journal article supplement (PMC10232706; doi:10.1007/s40820-023-01112-7), 2023-05-31
Supplement: 40820_2023_1112_MOESM1_ESM.pdf [file 40820_2023_1112_MOESM1_ESM.pdf]

Supporting Information

## Oxidative Molecular Layer Deposition Tailoring Eco-Mimetic Nanoarchitecture to Manipulate Electromagnetic Attenuation and Self-Powered Energy Conversion

Jin-Cheng Shu<sup>1</sup>, Yan-Lan Zhang<sup>1</sup>, Yong Qin<sup>2</sup>, Mao-Sheng Cao<sup>1,\*</sup><sup>1</sup>School of Materials Science and Engineering, Beijing Institute of Technology, Beijing 100081, P. R. China<sup>2</sup>Chinese Acad Sci, Inst Coal Chem, State Key Lab Coal Convers, 27 Taoyuan South Rd, Taiyuan 030001, Shanxi, P. R. China\*Corresponding author. E-mail: [caomaosheng@bit.edu.cn](mailto:caomaosheng@bit.edu.cn) (Mao-Sheng Cao)

### Supplementary Figures

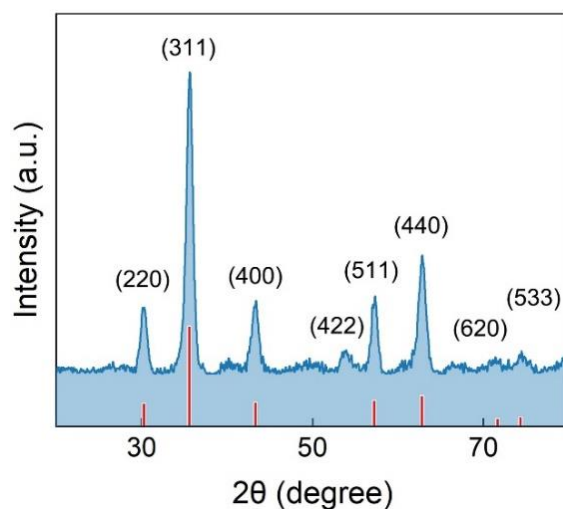**Fig. S1** XRD pattern of GF composite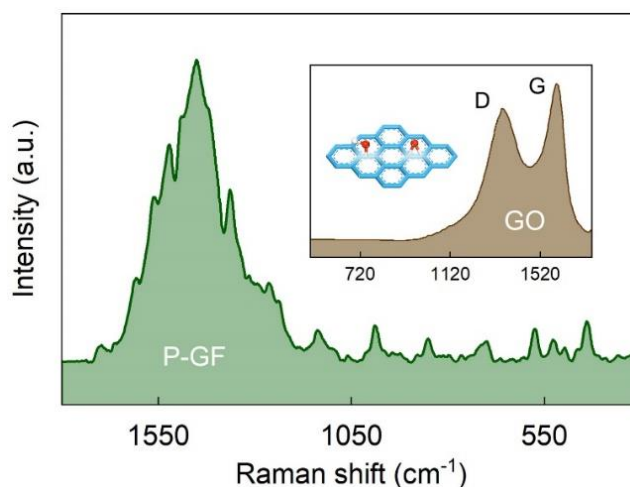**Fig. S2** Raman spectrum of P-GF eco-mimetic nanoarchitecture. Inset is the Raman spectrum and model of GO

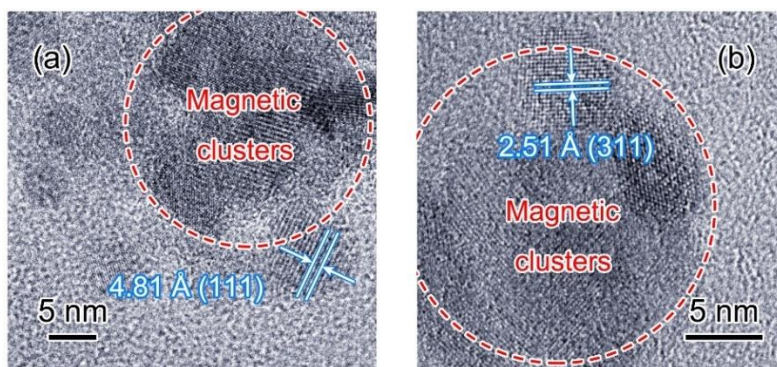

**Fig. S3** HR-TEM images of P-GF eco-mimetic nanoarchitecture
